# Supplementary material for: Quantitative cross-validation and content analysis of the 450k DNA methylation array from Illumina, Inc
Source: PubMed Central journal article supplement (PMC3420245; doi:10.1186/1756-0500-5-210), 2012-04-30
Supplement: 1756-0500-5-210-S3.pdf [file 1756-0500-5-210-S3.pdf]

|    | Index  | TargetID   | MapInfo   | Chr | Sample group |    |
|----|--------|------------|-----------|-----|--------------|----|
| 1  | 1571   | cg00066729 | 73633071  | 13  | CL           |    |
| 2  | 10610  | cg00499838 | 61148684  | 20  | CL           |    |
| 3  | 11103  | cg00522056 | 154335386 | 2   | CL           |    |
| 4  | 18782  | cg00893636 | 37034840  | 3   | CL           |    |
| 5  | 22187  | cg01052879 | 61809830  | 20  | CL           |    |
| 6  | 31944  | cg01544807 | 42195539  | 8   | CL           |    |
| 7  | 36273  | cg01773059 | 64761203  | 14  | CL           |    |
| 8  | 40498  | cg01972979 | 133680446 | X   | CL           |    |
| 9  | 44451  | cg02169391 | 130126176 | 7   | CL           |    |
| 10 | 51172  | cg02511809 | 112073544 | 5   | CL           | PT |
| 11 | 68548  | cg03387135 | 61809827  | 20  | CL           |    |
| 12 | 69196  | cg03422070 | 2722082   | 11  | CL           | PT |
| 13 | 76740  | cg03801902 | 4381800   | 12  | CL           | PT |
| 14 | 83513  | cg04155289 | 94953770  | 7   | CL           |    |
| 15 | 94715  | cg04743654 | 50378292  | 3   | CL           | PT |
| 16 | 98226  | cg04920951 | 67351271  | 11  | CL           |    |
| 17 | 101535 | cg05096161 | 46114674  | 17  | CL           |    |
| 18 | 114187 | cg05785947 | 68771059  | 16  | CL           |    |
| 19 | 140716 | cg07194250 | 133680463 | X   | CL           |    |
| 20 | 151357 | cg07776419 | 133680476 | X   | CL           |    |
| 21 | 154027 | cg07921535 | 94285911  | 7   |              | PT |
| 22 | 157895 | cg08133931 | 48636626  | 17  | CL           | PT |
| 23 | 166926 | cg08633479 | 57630524  | 6   | CL           |    |
| 24 | 186316 | cg09750382 | 61148781  | 20  | CL           |    |
| 25 | 188528 | cg09872616 | 130126182 | 7   | CL           |    |
| 26 | 189175 | cg09910998 | 94285942  | 7   |              | PT |
| 27 | 189637 | cg09938227 | 156390124 | 1   | CL           |    |
| 28 | 191737 | cg10065153 | 101291602 | 14  |              | PT |
| 29 | 197481 | cg10382221 | 46114672  | 17  | CL           |    |
| 30 | 200025 | cg10528576 | 101192913 | 14  | CL           | PT |
| 31 | 200977 | cg10583931 | 75379800  | 5   | CL           |    |
| 32 | 202006 | cg10639888 | 154335368 | 2   | CL           |    |
| 33 | 205123 | cg10830518 | 111804752 | 6   | CL           | PT |
| 34 | 205722 | cg10866298 | 9760869   | 8   | CL           |    |
| 35 | 206893 | cg10943497 | 101291571 | 14  |              | PT |
| 36 | 218741 | cg11666921 | 2722062   | 11  | CL           | PT |
| 37 | 228609 | cg12234996 | 53254760  | X   | CL           |    |
| 38 | 228713 | cg12243267 | 57630536  | 19  | CL           |    |
| 39 | 238601 | cg12877251 | 9760880   | 8   | CL           |    |
| 40 | 240171 | cg12981137 | 131265575 | 10  | CL           |    |
| 41 | 243790 | cg13218903 | 154335379 | 2   | CL           |    |
| 42 | 247514 | cg13431205 | 48893174  | 13  | CL           |    |
| 43 | 250649 | cg13575161 | 4381792   | 12  | CL           | PT |
| 44 | 253230 | cg13697378 | 68512845  | 1   | CL           |    |
| 45 | 257622 | cg13917504 | 130131258 | 7   | CL           |    |
| 46 | 257694 | cg13920367 | 68771035  | 16  | CL           |    |
| 47 | 261360 | cg14092276 | 101192852 | 14  | CL           | PT |
| 48 | 263641 | cg14203179 | 57430663  | 20  | CL           |    |
| 49 | 273465 | cg14687474 | 41278281  | 17  | CL           |    |

|    |        |            |           |    |    |    |
|----|--------|------------|-----------|----|----|----|
| 50 | 275055 | cg14783814 | 98511792  | 1  | CL |    |
| 51 | 279155 | cg15028514 | 61809841  | 20 | CL |    |
| 52 | 289005 | cg15651941 | 2722084   | 11 | CL | PT |
| 53 | 294361 | cg15980539 | 152128865 | 6  | CL |    |
| 54 | 294588 | cg15993083 | 4381788   | 12 | CL | PT |
| 55 | 294860 | cg16006004 | 41278241  | 17 | CL |    |
| 56 | 301895 | cg16417926 | 53254711  | X  | CL |    |
| 57 | 302034 | cg16424920 | 9760855   | 8  | CL |    |
| 58 | 308756 | cg16792632 | 64761208  | 14 | CL |    |
| 59 | 309320 | cg16829453 | 48636646  | 17 | CL | PT |
| 60 | 334053 | cg18372208 | 41278263  | 17 | CL |    |
| 61 | 334078 | cg18373878 | 101192860 | 14 | CL | PT |
| 62 | 334954 | cg18426655 | 14891118  | X  | CL |    |
| 63 | 336461 | cg18513313 | 46970868  | 10 | CL |    |
| 64 | 338247 | cg18627360 | 61809834  | 20 | CL |    |
| 65 | 345388 | cg19086599 | 61148784  | 20 | CL |    |
| 66 | 350927 | cg19454999 | 41278357  | 17 | CL |    |
| 67 | 354583 | cg19678392 | 94953810  | 7  | CL |    |
| 68 | 354840 | cg19694923 | 68516374  | 1  | CL |    |
| 69 | 357777 | cg19856728 | 87963592  | 1  | CL |    |
| 70 | 357868 | cg19861138 | 154335384 | 2  | CL |    |
| 71 | 358573 | cg19903753 | 53254678  | X  | CL |    |
| 72 | 362602 | cg20156391 | 61148764  | 20 | CL |    |
| 73 | 363262 | cg20206224 | 43543771  | 6  | CL | PT |
| 74 | 364850 | cg20311501 | 112073502 | 5  | CL | PT |
| 75 | 381209 | cg21384971 | 46114574  | 17 | CL |    |
| 76 | 382702 | cg21490561 | 37034825  | 3  | CL |    |
| 77 | 383297 | cg21526238 | 144329672 | 6  | CL |    |
| 78 | 383438 | cg21535000 | 9760877   | 8  | CL |    |
| 79 | 387119 | cg21778340 | 94285902  | 7  |    | PT |
| 80 | 395245 | cg22333214 | 98511789  | 1  | CL |    |
| 81 | 404836 | cg22955387 | 133680468 | X  | CL |    |
| 82 | 416438 | cg23658326 | 37034787  | 3  | CL | PT |
| 83 | 420805 | cg23938220 | 112073538 | 5  | CL | PT |
| 84 | 422092 | cg24007917 | 77272927  | 12 | CL | PT |
| 85 | 442774 | cg25288140 | 41278341  | 17 | CL |    |
| 86 | 443030 | cg25306939 | 2722086   | 11 | CL | PT |
| 87 | 444743 | cg25407198 | 130131268 | 7  | CL |    |
| 88 | 445046 | cg25425078 | 4381777   | 12 | CL | PT |
| 89 | 450411 | cg25771013 | 25989735  | 7  | CL |    |
| 90 | 454768 | cg26064831 | 24711899  | X  | CL |    |
| 91 | 454920 | cg26073933 | 156390102 | 1  | CL |    |
| 92 | 455251 | cg26094482 | 2722073   | 11 | CL | PT |
| 93 | 457999 | cg26250609 | 67351273  | 11 | CL |    |
| 94 | 464916 | cg26649384 | 154334651 | 2  | CL |    |
| 95 | 469522 | cg26908876 | 2722076   | 11 | CL | PT |
| 96 | 473757 | cg27150681 | 89618861  | 4  | CL |    |
| 97 | 475850 | cg27282761 | 74806951  | 5  | CL | PT |
| 98 | 477839 | cg27393730 | 94285951  | 7  |    | PT |
| 99 | 479992 | cg27526317 | 53254742  | X  | CL |    |

Sample group:

CL - Cell lines

PT - Primary Tissue
