# Supplementary material for: Quantitative cross-validation and content analysis of the 450k DNA methylation array from Illumina, Inc
Source: PubMed Central journal article supplement (PMC3420245; doi:10.1186/1756-0500-5-210), 2012-04-30
Supplement: 1756-0500-5-210-S4.pdf [file 1756-0500-5-210-S4.pdf]

## cell lines

## primary tissue

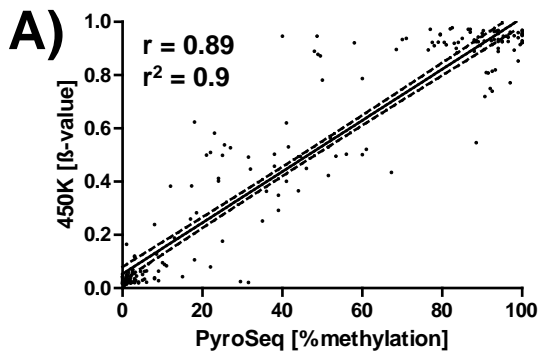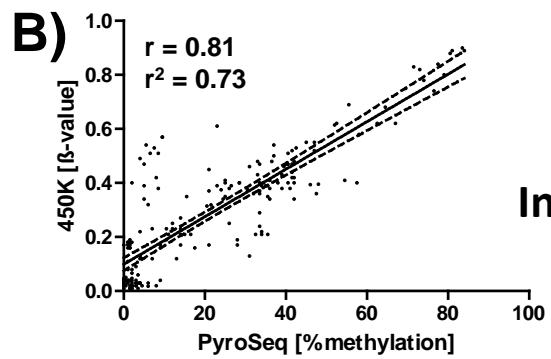

Infinium I

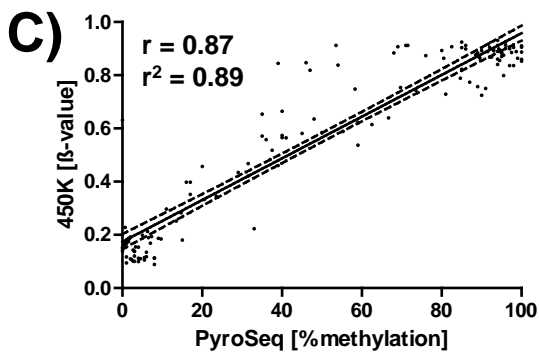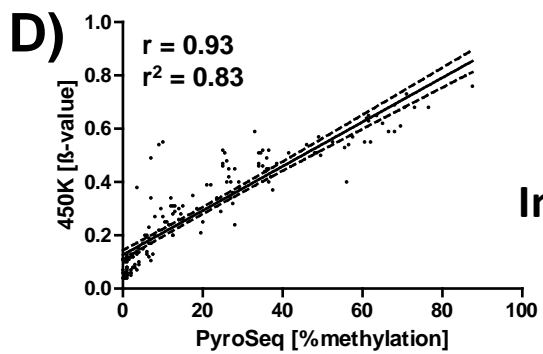

Infinium II

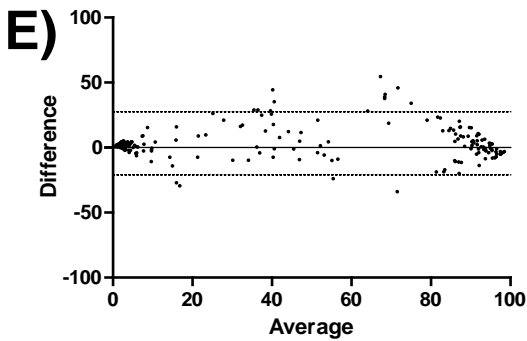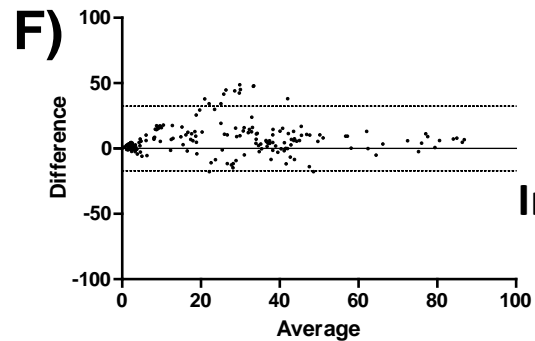

Infinium I

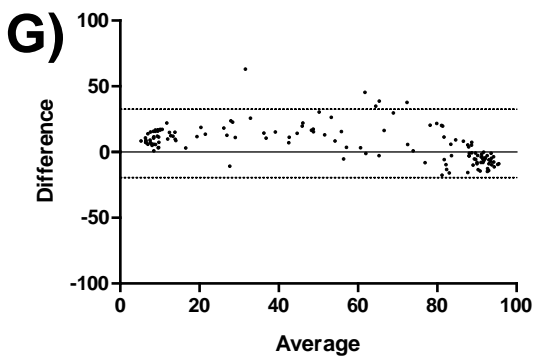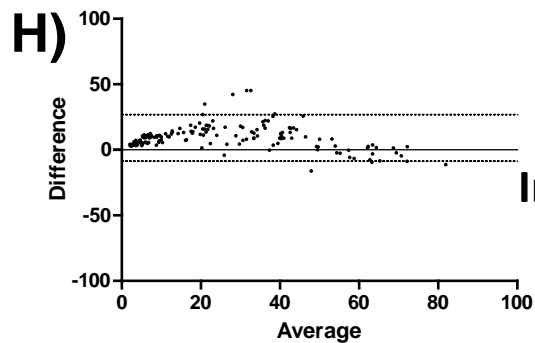

Infinium II
