# Supplementary material for: Quantitative cross-validation and content analysis of the 450k DNA methylation array from Illumina, Inc
Source: PubMed Central journal article supplement (PMC3420245; doi:10.1186/1756-0500-5-210), 2012-04-30
Supplement: 1756-0500-5-210-S6.pdf [file 1756-0500-5-210-S6.pdf]

## Supplementary Table S1 Patient material

| ID | age (yr) | Gender | Tissue                 |
|----|----------|--------|------------------------|
| 1  | 44       | female | invasive breast cancer |
| 2  | 92       | female | invasive breast cancer |
| 3  | 62       | female | invasive breast cancer |
| 4  | 60       | female | invasive breast cancer |
| 5  | 57       | female | invasive breast cancer |
| 6  | 55       | female | invasive breast cancer |
| 7  | 90       | female | invasive breast cancer |
| 8  | 68       | female | invasive breast cancer |
| 9  | 50       | female | invasive breast cancer |
| 10 | 64       | female | invasive breast cancer |
| 11 | 33       | female | invasive breast cancer |
| 12 | 32       | female | invasive breast cancer |
| 13 | 48       | female | invasive breast cancer |
| 14 | 37       | female | invasive breast cancer |
| 15 | 52       | female | invasive breast cancer |
| 16 | 25       | female | invasive breast cancer |
| 17 | 50       | female | invasive breast cancer |
| 18 | 32       | female | invasive breast cancer |
| 19 | 24       | female | normal breast tissue   |
| 20 | 28       | female | normal breast tissue   |
| 21 | 47       | female | normal breast tissue   |
| 22 | 32       | female | normal breast tissue   |
