# Supplementary material for: Quantitative cross-validation and content analysis of the 450k DNA methylation array from Illumina, Inc
Source: PubMed Central journal article supplement (PMC3420245; doi:10.1186/1756-0500-5-210), 2012-04-30
Supplement: 1756-0500-5-210-S7.pdf [file 1756-0500-5-210-S7.pdf]

| Gene           | Forward primer                             | Reverse Primer                             | Sequencing Primer                                                                                                                                                                                                                                                                                                                                                                                                                                                                                                                                                                                                                                                                                                                                                                                                                                                                                                                                                                                                                                                                 |
|----------------|--------------------------------------------|--------------------------------------------|-----------------------------------------------------------------------------------------------------------------------------------------------------------------------------------------------------------------------------------------------------------------------------------------------------------------------------------------------------------------------------------------------------------------------------------------------------------------------------------------------------------------------------------------------------------------------------------------------------------------------------------------------------------------------------------------------------------------------------------------------------------------------------------------------------------------------------------------------------------------------------------------------------------------------------------------------------------------------------------------------------------------------------------------------------------------------------------|
| APC            | GGA GAG AGA AGT AGT TGT GTA ATT T          | ACT ACA CCA ATA CAA CCA CAT ATC            | TTA GGG TGT TTT TTA TTT T                                                                                                                                                                                                                                                                                                                                                                                                                                                                                                                                                                                                                                                                                                                                                                                                                                                                                                                                                                                                                                                         |
| BRCA1          | TTG TGG GGT GAA TTT AAT ATG G              | CCC CAA AAA TCT AAA ACA AAT AAT CTT ATA    | GGA TAA AGA TAG TAA TTA GT<br>GAT TAT TTT ATT GAT TGG TG<br>ATA GTT TTG ATT TAA GGA TG<br>ATT TTA GGT TAG AGG GTT AT<br>AGY GGG TAG AGG GTA G<br>AGT GTG AGG AGG ATA GT<br>GGT TAG TTT TTT ATA GTT GGT<br>GTT TTT TTG GGT ATT TAA TTA TTG T<br>GGG ATT GTA TTT GTT TT<br>GTG TTT TTA TTT AGA GGT TA<br>GGT TGG TTT TTA GGT TT<br>TTT TTA GGG AGA AAA GTG<br>GGA TTA TTT TTA TAA GGT<br>GGT AGG GAA GGG GGT<br>GGG GGT AGG GAT TTT<br>GAA TGG GGT TGG TTG AGT AT<br>AAA CCC TCA AAA CTA AAA C<br>GAG TAG TAA GAG TTT TGG TG<br>CAA CTA AAA CAA AAA AAA ATA ACT C<br>TTC TTC CAA CTA ATC CCT AAC<br>TTT GGT TAG GTT GGG<br>TCA CTA CAA AAC TAT TCC C<br>AAA TAA CCC CAT ACA CTA C<br>GGG ATT GTT GTA ATG TTG<br>ATT YGT ATT ATA GTT TAG TAA AGG<br>GGT YGT TTA GGT TTG GT<br>TGG TAA TGT TTG GTA TTT<br>AAA TTA AAT GTT GGA AGA G<br>TAG TAT TAA GTA GAG AGG T<br>ATG GTT AAG GTG GGG TTG<br>CTT TAA AAA AAC CCC AA<br>TTG TTG TAA AGG AAA TTT<br>AGA ATT TTT GGT TTT AGG<br>TGG TGA GTG TTT GGG T<br>ATA GTT GTT TTA GGT TTA ATT<br>AGG GTT TAG AAG ATT TTA G<br>Sequencing Primer |
| CCND2          | GTA TTT TTT GTA AAG ATA GTT TTG ATT        | CCA AAC TTT CTC CCT AAA AAC                |                                                                                                                                                                                                                                                                                                                                                                                                                                                                                                                                                                                                                                                                                                                                                                                                                                                                                                                                                                                                                                                                                   |
| CDH1           | AGA TTT TAG TAA TTT TAG GTT AGA GG         | CTA ATT AAC TAA AAA TTC ACC TAC C          |                                                                                                                                                                                                                                                                                                                                                                                                                                                                                                                                                                                                                                                                                                                                                                                                                                                                                                                                                                                                                                                                                   |
| CSRP2          | GTT TTT TGT TTT TTG GTG GTT AG             | CAA AAA ATC CRA AAT CCC AAA C              |                                                                                                                                                                                                                                                                                                                                                                                                                                                                                                                                                                                                                                                                                                                                                                                                                                                                                                                                                                                                                                                                                   |
| DAPK1          | TTT YGG AGT GTG AGG AGG ATA                | AAA ACR CAA ATC CCT CCC AAA                |                                                                                                                                                                                                                                                                                                                                                                                                                                                                                                                                                                                                                                                                                                                                                                                                                                                                                                                                                                                                                                                                                   |
| DIRAS3         | TGG ATT AGT TTT TAG ATT GTT GTA GAT GT     | CCC CAA AAA CTC ACT CCT CC                 |                                                                                                                                                                                                                                                                                                                                                                                                                                                                                                                                                                                                                                                                                                                                                                                                                                                                                                                                                                                                                                                                                   |
| DLKp           | TTT GTG TTT TTT TGG GTA TTT AAT TAT TG     | TTA ATA CAC CTT CCC TCA CAC TAT ACA ACA    |                                                                                                                                                                                                                                                                                                                                                                                                                                                                                                                                                                                                                                                                                                                                                                                                                                                                                                                                                                                                                                                                                   |
| ER1            | TTY GTT TTG GGA TTG TAT TTG T              | ACC TAA AAA AAA AAC ACA ACC C              |                                                                                                                                                                                                                                                                                                                                                                                                                                                                                                                                                                                                                                                                                                                                                                                                                                                                                                                                                                                                                                                                                   |
| ER2            | TTT TTG TGG GTG GAT TAG GAG T              | CCC CTT CTT CCT TTT AAA AAC                |                                                                                                                                                                                                                                                                                                                                                                                                                                                                                                                                                                                                                                                                                                                                                                                                                                                                                                                                                                                                                                                                                   |
| FANCB          | TTT TTG GTT GGT TTT TAG GTT                | AAC CCC ATC CTA CCT CAA C                  |                                                                                                                                                                                                                                                                                                                                                                                                                                                                                                                                                                                                                                                                                                                                                                                                                                                                                                                                                                                                                                                                                   |
| GNASXL         | AGT GGG AGG AGG GGG TTT AGT TAA AG         | AAC CCC ACC AAC CTA ACC AAA AAA AT         |                                                                                                                                                                                                                                                                                                                                                                                                                                                                                                                                                                                                                                                                                                                                                                                                                                                                                                                                                                                                                                                                                   |
| GSTp1          | GGG GAG GGA TTA TTT TTA TAA                | AAT TAA CCC CAT ACT AAA AAC TCT            |                                                                                                                                                                                                                                                                                                                                                                                                                                                                                                                                                                                                                                                                                                                                                                                                                                                                                                                                                                                                                                                                                   |
| Hin1           | TGT TTG TTT TTA GAG GGT TTT AG             | TAA AAA AAC CCT ACC CRC TCC                |                                                                                                                                                                                                                                                                                                                                                                                                                                                                                                                                                                                                                                                                                                                                                                                                                                                                                                                                                                                                                                                                                   |
| hsa-mir-1-1    | TGG GGT TAA ATT TAT TTT GAA TTT G          | ACT CCC CAA CAA AAA CCT ACA C              |                                                                                                                                                                                                                                                                                                                                                                                                                                                                                                                                                                                                                                                                                                                                                                                                                                                                                                                                                                                                                                                                                   |
| hsa-mir-124A-1 | TTT TTT TAG GAG AAA GGT TTT                | AAA ACT CCA AAC CCC TC                     |                                                                                                                                                                                                                                                                                                                                                                                                                                                                                                                                                                                                                                                                                                                                                                                                                                                                                                                                                                                                                                                                                   |
| hsa-mir-124A-3 | AAA GGG GAG AAG TGT G                      | CAT ACC TTA ATT ATA TAA ACA TTA AAT C      |                                                                                                                                                                                                                                                                                                                                                                                                                                                                                                                                                                                                                                                                                                                                                                                                                                                                                                                                                                                                                                                                                   |
| hsa-mir-137    | AGT TTA GTT TAT TTT TAG GTA GGG G          | AAA ATC AAA AAA CCA AAC TAC C              |                                                                                                                                                                                                                                                                                                                                                                                                                                                                                                                                                                                                                                                                                                                                                                                                                                                                                                                                                                                                                                                                                   |
| hsa-mir-148A   | TGG GTA TTT GTT TTT GTT GAT T              | ACT ACA CTT AAA CCC CCT CTA ACC            |                                                                                                                                                                                                                                                                                                                                                                                                                                                                                                                                                                                                                                                                                                                                                                                                                                                                                                                                                                                                                                                                                   |
| hsa-mir-152    | GGA ATT TTG TGT TAT TTT TGA TTG            | CCA AAC AAA TAT TCC ACT ACA AAC            |                                                                                                                                                                                                                                                                                                                                                                                                                                                                                                                                                                                                                                                                                                                                                                                                                                                                                                                                                                                                                                                                                   |
| hsa-mir-424    | GGT AGT ATT TTT GGT TAG GTT GG             | AAA CAA TAC CCC AAA ACA CC                 |                                                                                                                                                                                                                                                                                                                                                                                                                                                                                                                                                                                                                                                                                                                                                                                                                                                                                                                                                                                                                                                                                   |
| hsa-mir-503    | GTA GTA TTT TTG GTT AGG TTG GG             | AAA CAA TAC CCC AAA ACA CC                 |                                                                                                                                                                                                                                                                                                                                                                                                                                                                                                                                                                                                                                                                                                                                                                                                                                                                                                                                                                                                                                                                                   |
| hsa-mir-9-1    | TTG TAT TTT TTG GTG TTG GTT AG             | CTC RTA TCC CTT CCC TCC TAC                |                                                                                                                                                                                                                                                                                                                                                                                                                                                                                                                                                                                                                                                                                                                                                                                                                                                                                                                                                                                                                                                                                   |
| hsa-mir-9-2    | GGA AGA GAT GTT GAT TGA GAA AA             | TAA TCA ACC AAC TAC CCC AC                 |                                                                                                                                                                                                                                                                                                                                                                                                                                                                                                                                                                                                                                                                                                                                                                                                                                                                                                                                                                                                                                                                                   |
| KLF11          | TTG TTT TYG TTT TTT GGA TGG AG             | AAA AAC AAA AAC CAT ACT ATT TAT TTT C      |                                                                                                                                                                                                                                                                                                                                                                                                                                                                                                                                                                                                                                                                                                                                                                                                                                                                                                                                                                                                                                                                                   |
| KLF5           | TGT TTT TTT TTT TGT TTA TAG GTT GG         | CCT CTA TTT CAC CCA ACT CC                 |                                                                                                                                                                                                                                                                                                                                                                                                                                                                                                                                                                                                                                                                                                                                                                                                                                                                                                                                                                                                                                                                                   |
| KvDMR          | AGG GAA GTT TTA GGG TGT GAA TTT TTA GAG    | CCA AAC CAC CCA CCT AAC AAA AAA C          |                                                                                                                                                                                                                                                                                                                                                                                                                                                                                                                                                                                                                                                                                                                                                                                                                                                                                                                                                                                                                                                                                   |
| MafB           | TTT AAT TTA ATT TTG TGG GGT GGT            | CCC CCA ACT ACT AAC AAA AAC TAC            |                                                                                                                                                                                                                                                                                                                                                                                                                                                                                                                                                                                                                                                                                                                                                                                                                                                                                                                                                                                                                                                                                   |
| MAL            | GTA TAG TTG GGA GTA ATT TTT TA             | CCA CAA ACT AAA AAT CTA CAA TA             |                                                                                                                                                                                                                                                                                                                                                                                                                                                                                                                                                                                                                                                                                                                                                                                                                                                                                                                                                                                                                                                                                   |
| MEG3           | GTT AGG TAG GGT GAA TTT AGG TAT AAT GTG TG | AAC AAC CTC TAA CTT ACA TCT AAA AAC CAA TT |                                                                                                                                                                                                                                                                                                                                                                                                                                                                                                                                                                                                                                                                                                                                                                                                                                                                                                                                                                                                                                                                                   |
|                | GTA TTT TGA TTT TTG YGA GAG GAT            | ATC CCC ACA CAC ATA CCC TTT                |                                                                                                                                                                                                                                                                                                                                                                                                                                                                                                                                                                                                                                                                                                                                                                                                                                                                                                                                                                                                                                                                                   |
| MEST           | AAG GGG GTT TTG TTT TTT TAA TTG TG         | AAC CCC ACA AAC TAC CCA CAA ACC            |                                                                                                                                                                                                                                                                                                                                                                                                                                                                                                                                                                                                                                                                                                                                                                                                                                                                                                                                                                                                                                                                                   |
|                | TTT TTG GGA ATA GGG TGA AGG T              | AAC CAC ACC CCC AAA AAA AAC TAA T          |                                                                                                                                                                                                                                                                                                                                                                                                                                                                                                                                                                                                                                                                                                                                                                                                                                                                                                                                                                                                                                                                                   |
| MGMT           | GTT TYG GAT ATG TTG GGA TAG                | AAC CAC TCR AAA CTA CCA CC                 |                                                                                                                                                                                                                                                                                                                                                                                                                                                                                                                                                                                                                                                                                                                                                                                                                                                                                                                                                                                                                                                                                   |
| Mint1          | TTY GGG TTG GGT ATT TGG ATT T              | TTC AAA CTC TCT CAA CAC TTA C              |                                                                                                                                                                                                                                                                                                                                                                                                                                                                                                                                                                                                                                                                                                                                                                                                                                                                                                                                                                                                                                                                                   |
| MINT12         | GGT TTT AGT TTT GAG GAT TAG G              | TCA CTA ACC TTT AAA TAA TCT AC             |                                                                                                                                                                                                                                                                                                                                                                                                                                                                                                                                                                                                                                                                                                                                                                                                                                                                                                                                                                                                                                                                                   |
| Gene           | Forward primer                             | Reverse Primer                             |                                                                                                                                                                                                                                                                                                                                                                                                                                                                                                                                                                                                                                                                                                                                                                                                                                                                                                                                                                                                                                                                                   |

|         |                                           |                                     |                               |
|---------|-------------------------------------------|-------------------------------------|-------------------------------|
| Mint17  | TGA AAG GGG TTA GGT TGA GG                | TTC TAC CTC TTC CCA AAT TCC         | AGG AAG AAT ATT TTG GAT G     |
| Mint27  | GGT TTG AGG AGG ATT TGG GA                | AAA AAC AAA ACT ACA ACC TTC AC      | TTT TGG TTA TTA GGT GTG A     |
| Mint31  | GTT TAG GGG TGA TGG TTT TAG               | AAA CAC TTC CCC AAC ATC TAC         | GTG GTG ATG GAG GTT AT        |
| MKRN3   | AAT TAT AGG TAA GGA AAG GGA GGA TGT AGT   | AAA CCT ACC CCA ACC TCA AAA AAA A   | ATT TGT AGA GGT TTT AGG       |
| MLH1    | TTT TAA AAA YGA ATT AAT AGG AAG AG        | AAA TAC CAA TCA AAT TTC TCA ACT C   | AAA YGA ATT AAT AGG AAG AG    |
| NAP1L5  | AGG GTA GTA ATA GGA GGA ATT TGG TGT AGT   | AAA CTC CTC AAC CAT CTA ACC AAC C   | AAG YGT ATA TTT TTT TAG GTA G |
| NTRK2   | TAG AGA GGG AGA GTG TTT TAA               | AGG AAT TTG RGT TTT AGA GAG TT      | GAT AGT GGG AAG TTA GTT AAG   |
| OPCML   | TAG GTA TTT TTA GTT YGG TGG               | CCA CTT TCT CCC RAT ACC             | TGG TGT TGG GGG TTT TA        |
| p15     | GTT GGT TTT TTA TTT TGT TAG AG            | AAC TCA ACT TCA TTA CCC TCC         | GGA GGT TAA GGT GGG           |
| p16     | GAG GGG TTG GTT GGT TAT TAG A             | TAC AAA CCC TCT ACC CAC CTA AAT     | GGG GCT AGT GAG GAT TT        |
| Peg10   | TTG GTT TAG GTG TGG GAT TTT T             | AAA CAT TCT AAA ATA CTA CTC CAT CTC | TGG TTA TTA GAG GGT G         |
| POL A   | TTT TTA AGG GGT TAT TAT AGG G             | CAA CCA ACC CAA AAC TAA C           | TCC ATC TCC CRC AAC TCC       |
| POL B   | TTT TGA TAT TGG TTG GTA GGT G             | ATC AAA ACT TTC TCT AAA AAT ACC     | AGG GTT ATT ATA GGG           |
| POLH    | AGA TTA TTY GTT GGT ATY GGG               | CCT AAA CTC AAC CTA CAC AC          | TGT GYG GGA GGA TTT TTG       |
| POLK    | TTG TAG GTG AGT TTG GTT AGG               | TAA AAA AAC RAA AAC CRA TCT CC      | GAA GTT GGA GGA GGA G         |
| POLZ    | TTT TTT GTT GGA TGT GAA ATG G             | CTC ATA AAT AAA CTC CRA AAA AC      | TTG TTT ATT TTA TTG AGG ATT   |
| PON1    | ATA GTT TGG ATT TAA TTT TTT GGG GG        | CAA ACA AAC AAA ACC TCC TAA CCC     | GAG GTA AGT GTG AGT AT        |
| Rassf1A | AGT TTG GAT TTT GGG GGA GG                | CAA CTC AAT AAA CTC AAA CTC CCC     | TTA TTT TTA AGA GGG TGA       |
| RB1     | GGT AGG GTA GTT TTG GAA ATG TTT AAG       | AAC CAC AAA CCC TTA CCC             | GGG TTY GTT TTG TGG TTT       |
| Rev1    | GTT AGT GTT TGT ATT TGT GTT TTT           | CCC TAT TAT TCT ACA ACC YCC         | AGT TTT GGA AAT GTT TAA GAT   |
| RPRM    | AAG AAG TAA GTA ATA AAA AGT AAG ATT AGG T | ACT TAA CRA AAC TAA ACC AAC C       | TTT AAG GYG GGG TAG G         |
| Sall3   | TGT GTT TTT TAT TAT TAG AGA TTG GG        | ACT ACC AAA CAT AAA AAC TTT CAA AA  | TTT TTT TAT TTT TTA AGA GTA G |
| SFRP1   | TTT TAG AGT AGT TTG YGT TGG G             | AAA ACA AAA TAC RAA CTC TAC CC      | CAT AAA AAC TTT CAA AAA AC    |
| SLC22A3 | TTG GGG ATT GYG TTT TTT GTT               | ACT CTA CRC CCT ATT CTC C           | GTA AGT TTT TTT AGA TTT TTG   |
| SMCX    | GTT GTT TTT TGG GGA AAG TTG GGT           | TCC TTT TAA TCC CTA CCA ACA ACC TA  | GAG GTT TTT GGA AGT TTG       |
| SOCS1   | AGA AGG GAT AGA GAA TAT TGG T             | ACT AAA AAA AAA TAA TTC ATT ACA AC  | GTA AGG GTT AAG GGT TGG A     |
| USP29   | GTG AAG ATG GTT TYG GGA TTT               | CAA CRA AAC CCC CAA CAT AC          | GGA TAG AGA ATA TTG GTG       |
| ZAC     | GAG ATG GAA GTT GGT AGG ACG TAG           | GCG AAA CCT CAC GAA TAA CG          | GTT TTT ATT TGG ATG GTA G     |
|         | GGT TGA ATG ATA AAT GGT AGA TGT           | ACC TTA ACT TTA CCC CCA C           | TGA TTG TAT TTG GGT TT        |
|         |                                           |                                     | TGG TAG GAG GAG GTT T         |
